# Supplementary material
Source: publisher site journal article supplement (https://www.dovepress.com/article/391753)
Supplement: Supplementary file 1 [file get_supplementary_file.php]

**Supplementary Data**

**Diagnostic codes used to define outcomes.**

**Bleeding Codes**

**B1 Hemarthrosis**

| **ICD** | **Codes** | **Content** |
| --- | --- | --- |
| ICD9 | 719.1 | Hemarthrosis |
| ICD10 | M25.0 | Hemarthrosis |

**B2 Major bleeding**

| **ICD** | **Codes** | **Content** |
| --- | --- | --- |
| ICD9 | 430 | Subarachnoid hemorrhage |
| ICD9 | 431 | Intracerebral hemorrhage |
| ICD9 | 432 | Other and unspecified intracranial hemorrhage |
| ICD9 | 456.0 | Esophageal varices with bleeding |
| ICD9 | 456.20 | Esophageal varices with bleeding |
| ICD9 | 530.7 | Gastroesophageal laceration-hemorrhage syndrome |
| ICD9 | 531.0 | Gastric ulcer, acute with hemorrhage |
| ICD9 | 531.2 | Gastric ulcer, acute with hemorrhage and perforation |
| ICD9 | 531.4 | Gastric ulcer, chronic or unspecified with hemorrhage |
| ICD9 | 531.6 | Gastric ulcer, chronic or unspecified with hemorrhage and perforation |
| ICD9 | 532.0 | Acute duodenal ulcer with hemorrhage |
| ICD9 | 532.2 | Acute duodenal ulcer with hemorrhage and perforation |
| ICD9 | 532.4 | Chronic or unspecified duodenal ulcer with hemorrhage |
| ICD9 | 532.6 | Chronic or unspecified duodenal ulcer with hemorrhage and perforation |
| ICD9 | 533.0 | Acute peptic ulcer of unspecified site with hemorrhage |
| ICD9 | 533.2 | Acute peptic ulcer of unspecified site with hemorrhage and perforation |
| ICD9 | 533.4 | Chronic or unspecified peptic ulcer of unspecified site with hemorrhage |
| ICD9 | 533.6 | Chronic or unspecified peptic ulcer of unspecified site with hemorrhage and perforation |
| ICD9 | 534.0 | Acute gastrojejunal ulcer with hemorrhage |
| ICD9 | 534.2 | Acute gastrojejunal ulcer with hemorrhage and perforation |
| ICD9 | 534.4 | Chronic or unspecified gastrojejunal ulcer with hemorrhage |
| ICD9 | 534.6 | Chronic or unspecified gastrojejunal ulcer with hemorrhage and perforation |
| ICD9 | 535.01 | Acute gastritis, with hemorrhage |
| ICD9 | 535.11 | Atrophic gastritis, with hemorrhage |
| ICD9 | 535.21 | Gastric mucosal hypertrophy, with hemorrhage |
| ICD9 | 535.31 | Alcoholic gastritis, with hemorrhage |
| ICD9 | 535.41 | Other specified gastritis, with hemorrhage |
| ICD9 | 535.51 | Unspecified gastritis and gastroduodenitis, with hemorrhage |
| ICD9 | 535.61 | Duodenitis, with hemorrhage |
| ICD9 | 535.71 | Eosinophilic gastritis, with hemorrhage |
| ICD9 | 569.3 | Hemorrhage of rectum and anus |
| ICD9 | 578 | Gastrointestinal hemorrhage |
| ICD9 | 800.2 | Closed fracture of vault of skull with subarachnoid subdural and extradural hemorrhage |
| ICD9 | 800.3 | Closed fracture of vault of skull with other and unspecified intracranial hemorrhage |
| ICD9 | 800.7 | Open fracture of vault of skull with subarachnoid subdural and extradural hemorrhage |
| ICD9 | 800.8 | Open fracture of vault of skull with other and unspecified intracranial hemorrhage |
| ICD9 | 801.2 | Closed fracture of base of skull with subarachnoid subdural and extradural hemorrhage |
| ICD9 | 801.3 | Closed fracture of base of skull with other and unspecified intracranial hemorrhage |
| ICD9 | 801.7 | Open fracture of base of skull with subarachnoid subdural and extradural hemorrhage |
| ICD9 | 801.8 | Open fracture of base of skull with other and unspecified intracranial hemorrhage |
| ICD9 | 803.2 | Other closed skull fracture with subarachnoid subdural and extradural hemorrhage |
| ICD9 | 803.3 | Closed skull fracture with other and unspecified intracranial hemorrhage |
| ICD9 | 803.7 | Other open skull fracture with subarachnoid subdural and extradural hemorrhage |
| ICD9 | 803.8 | Other open skull fracture with other and unspecified intracranial hemorrhage |
| ICD9 | 804.2 | Closed fractures involving skull or face with other bones with subarachnoid subdural and extradural hemorrhage |
| ICD9 | 804.3 | Closed fractures involving skull or face with other bones, with other and unspecified intracranial hemorrhage |
| ICD9 | 804.7 | Open fractures involving skull or face with other bones with subarachnoid subdural and extradural hemorrhage |
| ICD9 | 804.8 | Open fractures involving skull or face with other bones with other and unspecified intracranial hemorrhage |
| ICD9 | 852 | Subarachnoid subdural and extradural hemorrhage following injury |
| ICD10 | I60 | Nontraumatic subarachnoid hemorrhage |
| ICD10 | I61 | Nontraumatic intracerebral hemorrhage |
| ICD10 | I62 | Other and unspecified nontraumatic intracranial hemorrhage |
| ICD10 | I85.01 | Esophageal varices with bleeding |
| ICD10 | I85.11 | Secondary esophageal varices with bleeding |
| ICD10 | K22.6 | Gastro-esophageal laceration-hemorrhage syndrome |
| ICD10 | K25.0 | Acute gastric ulcer with hemorrhage |
| ICD10 | K25.2 | Acute gastric ulcer with both hemorrhage and perforation |
| ICD10 | K25.4 | Chronic or unspecified gastric ulcer with hemorrhage |
| ICD10 | K25.6 | Chronic or unspecified gastric ulcer with both hemorrhage and perforation |
| ICD10 | K26.0 | Acute duodenal ulcer with hemorrhage |
| ICD10 | K26.2 | Acute duodenal ulcer with both hemorrhage and perforation |
| ICD10 | K26.4 | Chronic or unspecified duodenal ulcer with hemorrhage |
| ICD10 | K26.6 | Chronic or unspecified duodenal ulcer with both hemorrhage and perforation |
| ICD10 | K27.0 | Acute peptic ulcer, site unspecified, with hemorrhage |
| ICD10 | K27.2 | Acute peptic ulcer, site unspecified, with both hemorrhage and perforation |
| ICD10 | K27.4 | Chronic or unspecified peptic ulcer, site unspecified, with hemorrhage |
| ICD10 | K27.6 | Chronic or unspecified peptic ulcer, site unspecified, with both hemorrhage and perforation |
| ICD10 | K28.0 | Acute gastrojejunal ulcer with hemorrhage |
| ICD10 | K28.2 | Acute gastrojejunal ulcer with both hemorrhage and perforation |
| ICD10 | K28.4 | Chronic or unspecified gastrojejunal ulcer with hemorrhage |
| ICD10 | K28.6 | Chronic or unspecified gastrojejunal ulcer with both hemorrhage and perforation |
| ICD10 | K29.01 | Acute gastritis with bleeding |
| ICD10 | K29.21 | Alcoholic gastritis with bleeding |
| ICD10 | K29.31 | Chronic superficial gastritis with bleeding |
| ICD10 | K29.41 | Chronic atrophic gastritis with bleeding |
| ICD10 | K29.51 | Unspecified chronic gastritis with bleeding |
| ICD10 | K29.61 | Other gastritis with bleeding |
| ICD10 | K29.71 | Gastritis, unspecified, with bleeding |
| ICD10 | K29.81 | Duodenitis with bleeding |
| ICD10 | K29.91 | Gastroduodenitis, unspecified, with bleeding |
| ICD10 | K31.82 | Dieulafoy lesion (hemorrhagic) of stomach and duodenum |
| ICD10 | K62.5 | Hemorrhage of anus and rectum |
| ICD10 | K76.2 | Central hemorrhagic necrosis of liver |
| ICD10 | K92.0 | Hematemesis |
| ICD10 | K92.1 | Melena |
| ICD10 | K92.2 | Gastrointestinal hemorrhage, unspecified |
| ICD10 | S06.4 | Epidural hemorrhage |

**B3 Other bleeding**

| **ICD** | **Codes** | **Content** |
| --- | --- | --- |
| ICD9 | 246.3 | Hemorrhage and infarction of thyroid |
| ICD9 | 258.1 | Other combinations of endocrine dysfunction |
| ICD9 | 285.1 | Acute posthemorrhagic anemia |
| ICD9 | 287.8 | Other specified hemorrhagic conditions |
| ICD9 | 287.9 | Unspecified hemorrhagic conditions |
| ICD9 | 362.81 | Retinal hemorrhage |
| ICD9 | 363.6 | Choroidal hemorrhage and rupture |
| ICD9 | 364.41 | Hyphema |
| ICD9 | 372.72 | Conjunctival hemorrhage |
| ICD9 | 379.23 | Vitreous hemorrhage |
| ICD9 | 380.31 | Hematoma of auricle or pinna |
| ICD9 | 423.0 | Hemopericardium |
| ICD9 | 429.79 | Other certain sequelae of myocardial infarction, not elsewhere classified |
| ICD9 | 459.0 | Hemorrhage, unspecified |
| ICD9 | 568.81 | Hemoperitoneum (nontraumatic) |
| ICD9 | 599.7 | Hematuria |
| ICD9 | 602.1 | Congestion or hemorrhage of prostate |
| ICD9 | 626.5 | Ovulation bleeding |
| ICD9 | 626.6 | Metrorrhagia |
| ICD9 | 626.8 | Other disorders of menstruation and other abnormal bleeding from female genital tract |
| ICD9 | 626.9 | Unspecified disorder of menstruation and other abnormal bleeding from female genital tract |
| ICD9 | 627.0 | Premenopausal menorrhagia |
| ICD9 | 627.1 | Postmenopausal bleeding |
| ICD9 | 729.92 | Nontraumatic hematoma of soft tissue |
| ICD9 | 784.7 | Epistaxis |
| ICD9 | 784.8 | Hemorrhage from throat |
| ICD9 | 786.3 | Hemoptysis |
| ICD9 | 860.2 | Traumatic hemothorax without mention of open wound into thorax |
| ICD9 | 860.3 | Traumatic hemothorax with open wound into thorax |
| ICD9 | 958.2 | Secondary and recurrent hemorrhage |
| ICD10 | D62 | Acute posthemorrhagic anemia |
| ICD10 | D69.8 | Other specified hemorrhagic conditions |
| ICD10 | D69.9 | Hemorrhagic condition, unspecified |
| ICD10 | H11.3 | Conjunctival hemorrhage |
| ICD10 | H21.0 | Hyphema |
| ICD10 | H31.3 | Choroidal hemorrhage and rupture |
| ICD10 | H35.6 | Retinal hemorrhage |
| ICD10 | H43.1 | Vitreous hemorrhage |
| ICD10 | H61.12 | Hematoma of pinna |
| ICD10 | H92.2 | Otorrhagia |
| ICD10 | I23.0 | Hemopericardium as current complication following acute myocardial infarction |
| ICD10 | I31.2 | Hemopericardium, not elsewhere classified |
| ICD10 | J94.2 | Hemothorax |
| ICD10 | K66.1 | Hemoperitoneum |
| ICD10 | M79.81 | Nontraumatic hematoma of soft tissue |
| ICD10 | N02 | Recurrent and persistent hematuria |
| ICD10 | N42.1 | Congestion and hemorrhage of prostate |
| ICD10 | ﻿N93.8 | Other specified abnormal uterine and vaginal bleeding |
| ICD10 | N93.9 | Abnormal uterine and vaginal bleeding, unspecified |
| ICD10 | N95.0 | Postmenopausal bleeding |
| ICD10 | R04 | Hemorrhage from respiratory passages |
| ICD10 | R31 | Hematuria |
| ICD10 | R58 | Hematuria |
| ICD10 | S26.0 | Injury of heart with hemopericardium |
| ICD10 | S27.1 | Traumatic hemothorax |
| ICD10 | T79.2 | Traumatic secondary and recurrent hemorrhage and seroma |

**A1 Arthropathy**

**Arthropathy Event codes:**

| **ICD** | **Codes** | **Content** |
| --- | --- | --- |
| ICD9 | 713 | Arthropathy associated with other disorders classified elsewhere |
| ICD9 | 715 | Osteoarthrosis and allied disorders |
| ICD9 | 716 | Other and unspecified arthropathies |
| ICD10 | M02.9 | Reactive arthropathy, unspecified |
| ICD10 | M12 | Other and unspecified arthropathy |
| ICD10 | M14 | Arthropathies in other diseases classified elsewhere |
| ICD10 | M15 | Polyosteoarthritis |
| ICD10 | M16 | Osteoarthritis of hip |
| ICD10 | M17 | Osteoarthritis of knee |
| ICD10 | M18 | Osteoarthritis of first carpometacarpal joint |
| ICD10 | M19 | Other and unspecified osteoarthritis |
| ICD10 | M36.2 | Hemophilic arthropathy |
| ICD10 | M36.3 | Arthropathy in other blood disorders |
| ICD9_exclude | 715.1 | Osteoarthrosis localized primary |
| ICD9_exclude | 716.0 | Kaschin-beck disease |
| ICD9_exclude | 716.2 | Allergic arthritis |
| ICD9_exclude | 716.3 | Climacteric arthritis |
| ICD9_exclude | 716.4 | Transient arthropathy |
| ICD10_exclude | M12.0 | Chronic post rheumatic arthropathy [Jaccoud] |
| ICD10_exclude | M12.1 | Kaschin-Beck disease |
| ICD10_exclude | M12.2 | Villonodular synovitis (pigmented) |
| ICD10_exclude | M12.3 | Palindromic rheumatism |
| ICD10_exclude | M12.4 | Intermittent hydrarthrosis |
| ICD10_exclude | M15.0 | Primary generalized (osteo)arthritis |
| ICD10_exclude | M16.0 | Bilateral primary osteoarthritis of hip |
| ICD10_exclude | M16.1 | Unilateral primary osteoarthritis of hip |
| ICD10_exclude | M17.0 | Bilateral primary osteoarthritis of knee |
| ICD10_exclude | M17.1 | Unilateral primary osteoarthritis of knee |
| ICD10_exclude | M18.0 | Bilateral primary osteoarthritis of first carpometacarpal joints |
| ICD10_exclude | M18.1 | Unilateral primary osteoarthritis of first carpometacarpal joint |
| ICD10_exclude | M19.0 | Primary osteoarthritis of other joints |

**A2 Hemophilic arthropathy**

| **ICD** | **Codes** | **Content** |
| --- | --- | --- |
| ICD9 | 713.2 | Arthropathy associated with hematological disorders |
| ICD10 | M36.2 | Hemophilic arthropathy |
| ICD10 | M36.3 | Arthropathy in other blood disorders |

**Procedures:**

**P1 synovectomy**

| **ICD** | **Codes** | **Content** |
| --- | --- | --- |
| ICD9_PCS | 80.70 | Synovectomy, unspecified site |
| ICD9_PCS | 80.71 | Synovectomy, shoulder |
| ICD9_PCS | 80.72 | Synovectomy, elbow |
| ICD9_PCS | 80.73 | Synovectomy, wrist |
| ICD9_PCS | 80.74 | Synovectomy, hand and finger |
| ICD9_PCS | 80.75 | Synovectomy, hip |
| ICD9_PCS | 80.76 | Synovectomy, knee |
| ICD9_PCS | 80.77 | Synovectomy, ankle |
| ICD9_PCS | 80.78 | Synovectomy, foot and toe |
| ICD9_PCS | 80.79 | Synovectomy, other specified sites |
| drug_no | 64054B | Synovectomy or/and capsulectomy - hip |
| drug_no | 64055B | Synovectomy or/and capsulectomy - knee |
| drug_no | 64056B | Synovectomy or/and capsulectomy - shoulder elbow, wrist or ankle |
| drug_no | 64057B | Synovectomy or/and capsulectomy - phalanges |

**P2 Arthrodesis**

| **ICD** | **Codes** | **Content** |
| --- | --- | --- |
| ICD9_PCS | 77.52 | Bunionectomy with soft tissue correction and arthrodesis |
| ICD9_PCS | 81.12 | Triple arthrodesis |
| ICD9_PCS | 81.20 | Arthrodesis of unspecified joint |
| ICD9_PCS | 81.21 | Arthrodesis of hip |
| ICD9_PCS | 81.22 | Arthrodesis of knee |
| ICD9_PCS | 81.23 | Arthrodesis of shoulder |
| ICD9_PCS | 81.24 | Arthrodesis of elbow |
| ICD9_PCS | 81.29 | Arthrodesis of other specified joints |
| drug_no | 64058B | Arthrodesis of finger, toe |
| drug_no | 64178B | Arthrodesis of hip joint |
| drug_no | 64179B | Arthrodesis of shoulder joint |
| drug_no | 64180B | Arthrodesis of knee joint |
| drug_no | 64181B | Arthrodesis of elbow joint |
| drug_no | 64182B | Arthrodesis of wrist joint or carpal joint |
| drug_no | 64183B | Arthrodesis of ankle joint |
| drug_no | 64281B | Hindfoot Arthrodesis、Triple arthrodesis, etc. |

**P3 Arthroplasty**

| **ICD** | **Codes** | **Content** |
| --- | --- | --- |
| ICD9_PCS | 76.5 | Temporomandibular arthroplasty |
| ICD9_PCS | 81.71 | Arthroplasty of metacarpophalangeal and interphalangeal joint with implant |
| ICD9_PCS | 81.72 | Arthroplasty of metacarpophalangeal and interphalangeal joint without implant |
| ICD9_PCS | 81.74 | Arthroplasty of carpocarpal or carpometacarpal joint with implant |
| ICD9_PCS | 81.75 | Arthroplasty of carpocarpal or carpometacarpal joint without implant |
| drug_no | 64171B | Arthroplasty of hip joint |
| drug_no | 64172B | Arthroplasty of elbow joint |
| drug_no | 64173B | Arthroplasty of shoulder joint |
| drug_no | 64174B | Arthroplasty of wrist joint |
| drug_no | 64175B | Arthroplasty of ankle joint |
| drug_no | 64176B | Arthroplasty of knee joint |
| drug_no | 64177B | Arthroplasty of finger、toe、metatarsal or metacarpal joint |
| drug_no | 64186B | Arthroplasty of temporomandibular joint |
| drug_no | 64227B | Prosthetic arthroplasty of basal joint |
| drug_no | 64232B | Volar plate arthroplasty |
| drug_no | 64244B | Arthroscopic surgery-arthroscopic shaving or abrasion arthroplasty，drilling or pinning or removal of loose body or osteochondral fragment |
| drug_no | 64259B | Shoulder joint hemiarthroplasty |
| drug_no | 92201B | Subcondylar osteotomy or arthroplasty, unilateral |

**P4 Joint replacement**

| **ICD** | **Codes** | **Content** |
| --- | --- | --- |
| ICD9_PCS | 81.51 | Total hip replacement |
| ICD9_PCS | 81.52 | Partial hip replacement |
| ICD9_PCS | 81.53 | Revision of hip replacement |
| ICD9_PCS | 81.54 | Total knee replacement |
| ICD9_PCS | 81.55 | Revision of knee replacement |
| ICD9_PCS | 81.56 | Total ankle replacement |
| ICD9_PCS | 81.57 | Replacement of joint of foot and toe |
| ICD9_PCS | 81.59 | Revision of joint replacement of lower extremity, not elsewhere classified |
| ICD9_PCS | 81.73 | Total wrist replacement |
| ICD9_PCS | 81.80 | Total shoulder replacement |
| ICD9_PCS | 81.81 | Partial shoulder replacement |
| ICD9_PCS | 81.84 | Total elbow replacement |
| ICD9_PCS | 81.97 | Revision of joint replacement of upper extremity |
| ICD9 | V43.60 | Joint replaced by other means, unspecified |
| ICD9 | V43.61 | Joint replaced by other means, shoulder |
| ICD9 | V43.62 | Joint replaced by other means, elbow |
| ICD9 | V43.63 | Joint replaced by other means, wrist |
| ICD9 | V43.64 | Joint replaced by other means, hip |
| ICD9 | V43.65 | Joint replaced by other means, knee |
| ICD9 | V43.66 | Joint replaced by other means, ankle |
| ICD9 | V43.69 | Joint replaced by other means, other |
| drug_no | 64162B | Total hip replacement |
| drug_no | 64163B | Total shoulder replacement |
| drug_no | 64164B | Total knee replacement |
| drug_no | 64165B | Total elbow replacement |
| drug_no | 64166B | Total wrist replacement |
| drug_no | 64167B | Total ankle replacement |
| drug_no | 64168B | Total finger or toe replacement |
| drug_no | 64169B | Partial joint replacement - femoral condylar or tibial plateau or unicompartment |
| drug_no | 64170B | Partial joint replacement - cup or hip prosthesis or unicompartment |
| drug_no | 64201B | Revision total hip replacement |
| drug_no | 64202B | Revision total knee replacement |
| drug_no | 64258B | Revision of bipolar prothesis |
| drug_no | 97801K | - |
| drug_no | 97802A | - |
| drug_no | 97803B | - |
| drug_no | 97805K | - |
| drug_no | 97806A | - |
| drug_no | 97807B | - |
| drug_no | 97811K | - |
| drug_no | 97812A | - |
| drug_no | 97813B | - |

**Definition of outcomes:**

| B1 | Hemarthrosis |
| --- | --- |
| B2 | Major bleeding |
| B3 | Other bleeding |
| A1 | Arthropathy |
| A2 | Hemophilic arthropathy |
| P1 | Synovectomy |
| P2 | Arthrodesis |
| P3 | Arthroplasty |
| P4 | Joint replacement |

| **Outcomes** | **Definition** |
| --- | --- |
| Any bleeding | Use of coagulation factor dose (unit/day) is 20% more than the dose in previous month. |
| Major bleeding | Meet any of the following: (identified in every month)   - Use of coagulation factor dose (unit/day) during one hospitalization is 20% more than the dose in the month preceding admission. - Hospitalization with diagnosis codes listed in Table B1, B2, or B3. |
| Hospitalization due to arthropathy | Hospitalization record with procedure codes listed in Table P1, P2, P3, or P4. |
